# Supplementary material for: In Silico Evaluation of In Vivo Degradation Kinetics of Poly(Lactic Acid) Vascular Stent Devices
Source: MDPI journal article supplement (doi:10.3390/jfb15050135), 2024-05-17
Supplement: s1 [file s1]

# In Silico Evaluation of In Vivo Degradation Kinetics of Poly(Lactic Acid) Vascular Stent Devices

Shicheng He <sup>1</sup>, Lingling Wei <sup>2</sup>, Guixue Wang <sup>3</sup>, Nicola M. Pugno <sup>4,5</sup>, Qiang Chen <sup>1,\*</sup> and Zhiyong Li <sup>1,6,7,\*</sup>

<sup>1</sup> Biomechanics Laboratory, School of Biological Science and Medical Engineering, Southeast University, Nanjing 210096, China

<sup>2</sup> School of Food and Biological Engineering, Hefei University of Technology, Hefei 230601, China

<sup>3</sup> Key Laboratory for Biorheological Science and Technology of Ministry of Education, State and Local Joint Engineering Laboratory for Vascular Implants, Bioengineering College of Chongqing University, Chongqing 400030, China

<sup>4</sup> Laboratory for Bioinspired, Bionic, Nano, Meta Materials and Mechanics, University of Trento, Via Mesiano 77, 38123 Trento, Italy

<sup>5</sup> School of Engineering and Materials Science, Queen Mary University of London, Mile End Road, London E1 4NS, UK

<sup>6</sup> School of Mechanical, Medical and Process Engineering, Queensland University of Technology, Brisbane, QLD 4001, Australia

<sup>7</sup> Faculty of Sports Science, Ningbo University, Ningbo 315211, China

\* Correspondence: cq@seu.edu.cn (Q.C.); zhiyong.li@qut.edu.au (Z.L.)

## Supplementary Materials

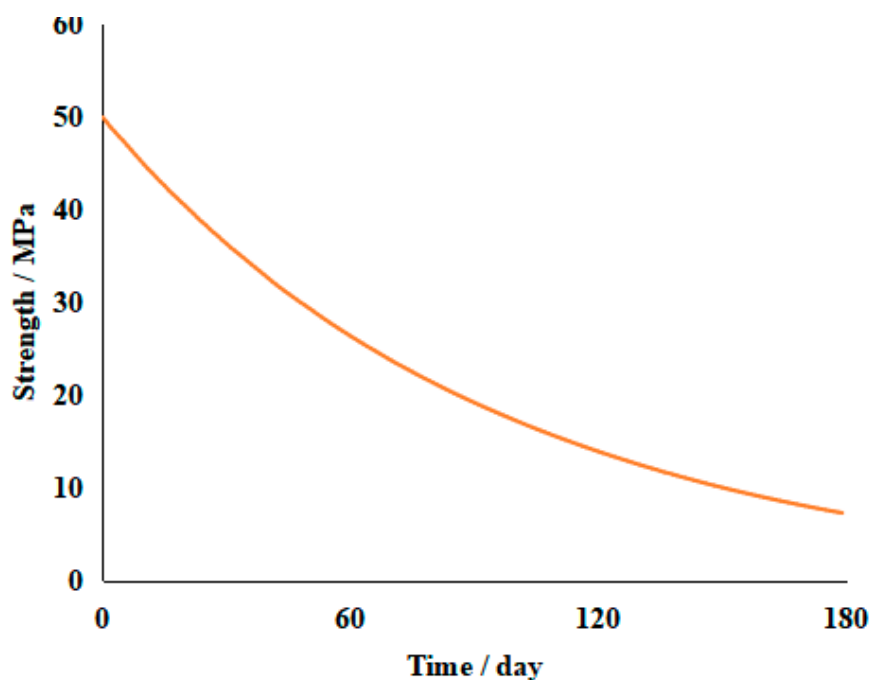

Figure S1 The current strength decay curve of PLA

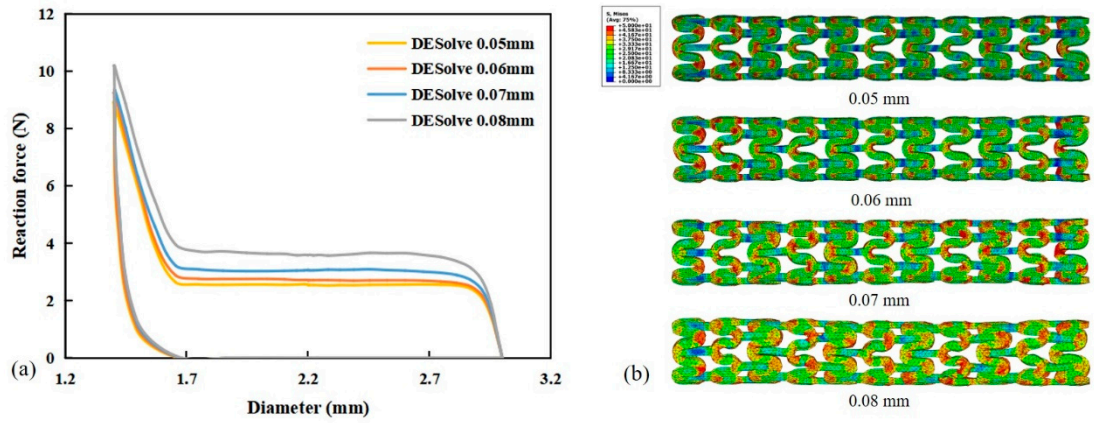

**Figure S2.** Mesh density analysis of the DESolve stent with four element sizes. (a) The diameter-force curves of the DESolve stent during the whole crimping process, (b) Stress distribution patterns.

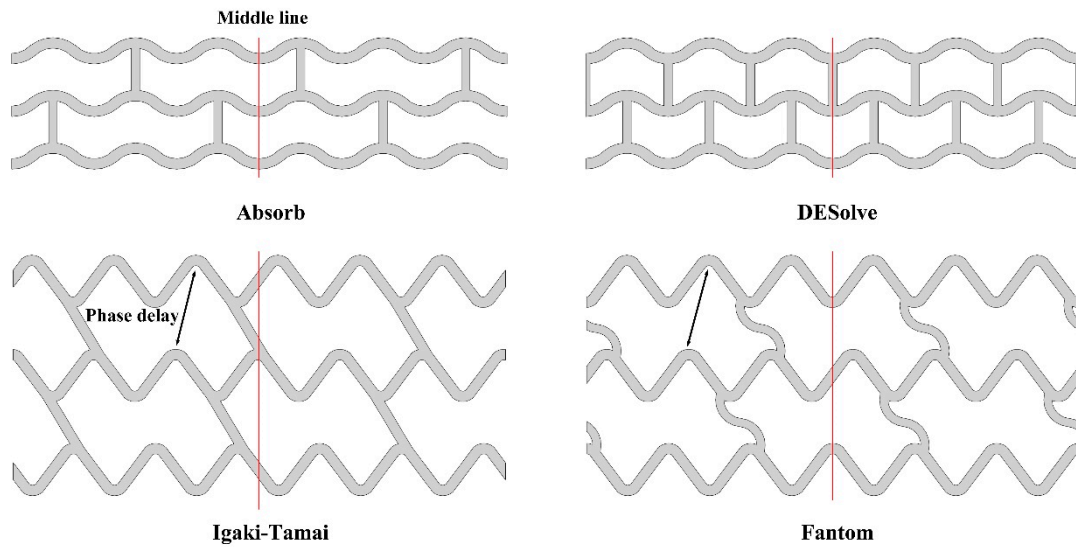

**Figure S3.** The planar expansion of the four stents. Noted that the structure of the DESolve stent was strictly symmetric, and it enabled the apparent periodic degradation behaviors.
